# Supplementary material
Source: publisher figshare collection journal article supplement (https://geolsoc.figshare.com/ndownloader/files/34843114)

# Early Cretaceous oceanic island basalt-type magmatism in northern Guangdong: Implications for lithospheric thinning in the South China Block

Hai Jiang<sup>1</sup>, Shang Shao<sup>2</sup>, Shao-Yong Jiang<sup>1\*</sup>, Shui-Yuan Yang<sup>1</sup>, Kui-Dong Zhao<sup>1</sup>

<sup>1</sup> State Key Laboratory of Geological Processes and Mineral Resources, School of Earth Resources, Collaborative Innovation Center for Exploration of Strategic Mineral Resources, China University of Geosciences, Wuhan 430074, China

<sup>2</sup> Research Institute No. 290, CNNC, Shaoguan 512029, China

\*Corresponding author (e-mail: [shyjiang@cug.edu.cn](mailto:shyjiang@cug.edu.cn))

**Supplementary Figure S1.** Elements vs. Zr correlation diagrams for the Meiziwo lamprophyres.

**Supplementary Figure S2.** Plots of (a)  $\epsilon_{\text{Nd}}(t)$  vs.  $\text{SiO}_2$ , (b) Nb/La vs.  $\text{SiO}_2$  and (c) Nb/U vs. Nb for the Meiziwo lamprophyres. AFC: assimilation and fractional crystallization; FC: fractional crystallization. Data for MORB and OIB are after [Hofmann et al. \(2014\)](#). Other data for comparison are the same as in [Fig. 4](#).

**Supplementary Figure S3.** Binary diagrams of (a)  $\text{SiO}_2$  vs. MgO, (b) Ni vs. MgO, (c) Dy/Dy\* vs. Dy/Yb (after [Davidson et al. 2013](#)), (d)  $\text{TiO}_2$  vs.  $\text{SiO}_2$ , (e)  $\text{Fe}_2\text{O}_3^{\text{T}}$  vs.  $\text{SiO}_2$  and (f)  $\text{Al}_2\text{O}_3$  vs. MgO for the Meiziwo lamprophyres. In (c), Amp = amphibole, Cpx = clinopyroxene, Grt = garnet; the definition of Dy/Dy\* [ $\text{Dy/Dy}^* = \text{Dy}_\text{N}/(\text{La}_\text{N}^{4/13} \cdot \text{Yb}_\text{N}^{9/13})$ , where N denotes the chondrite-normalized values of [Sun and McDonough \(1989\)](#)] is from [Davidson et al. \(2013\)](#). Abbreviations: PM: primitive mantle; MORB: mid-oceanic-ridge basalt; OIB: oceanic island basalt.

**Supplementary Figure S4.** Plots of (a) Yb and (b) Mg# vs. Fe/Mn for the Meiziwo lamprophyres (after [Wang et al. 2012](#)). The range of Fe/Mn ratios in mid-oceanic ridge basalts (MORB) is from [Qin and Humayun \(2008\)](#).

Supplementary Figure S1

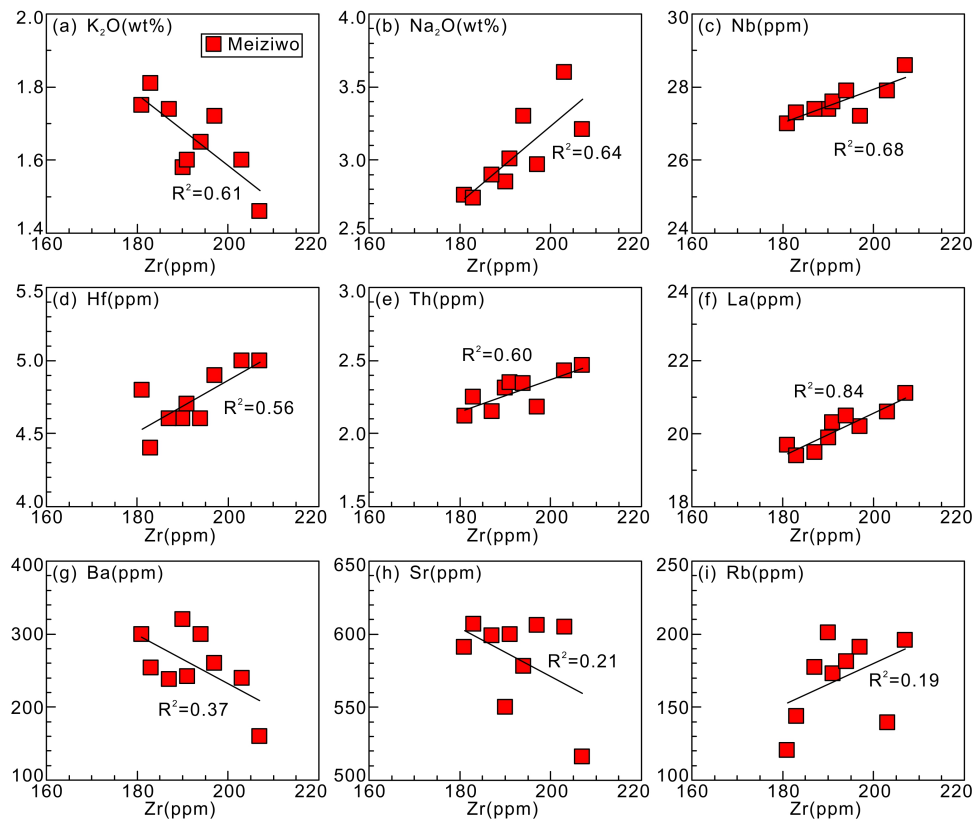

Supplementary Figure S2

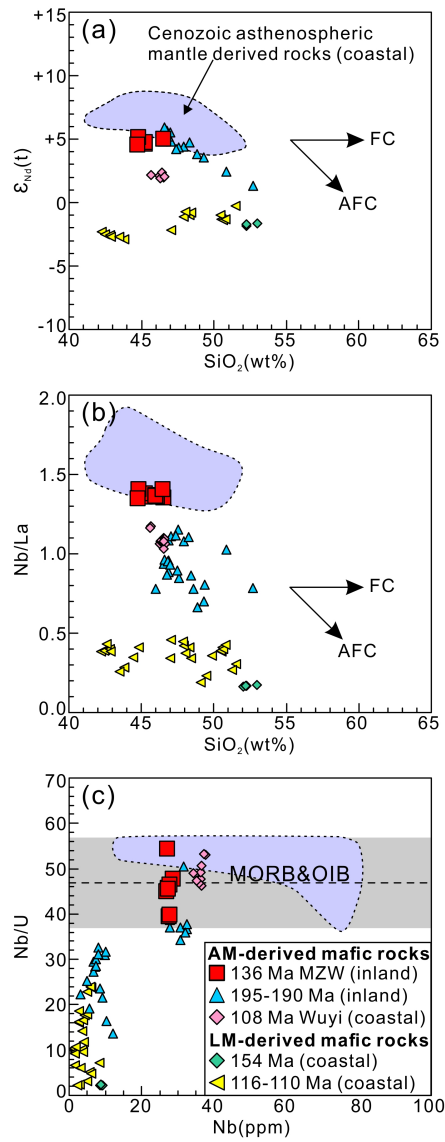

Supplementary Figure S3

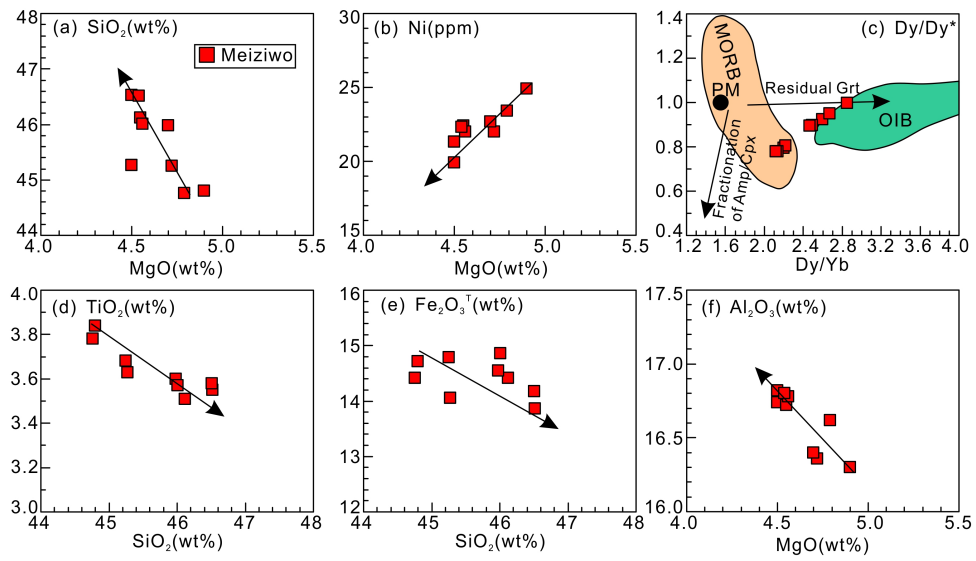

Supplementary Figure S4

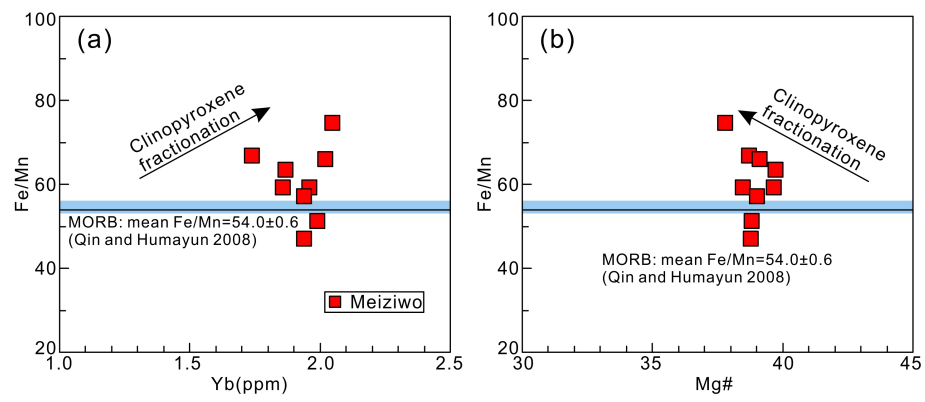

Supplement: Supplementary file 1 [file 34843114]
